# Supplementary material for: Spatially Resolved Functional Group Analysis of OLED Materials Using EELS and ToF-SIMS
Source: PubMed Central journal article supplement — Anal Chem. 2024 Jul 5;96(31):12616–21. doi: 10.1021/acs.analchem.4c00742 (PMC11307249; doi:10.1021/acs.analchem.4c00742), 2024-07-05
Supplement: ac4c00742_si_001.pdf [file ac4c00742_si_001.pdf]

Supporting Information for

# **Spatially Resolved Functional Group Analysis of OLED Materials using EELS and ToF-SIMS**

*Kyun Seong Dae,<sup>1</sup> Kyung Soon Jang,<sup>1</sup> Chang Min Choi,<sup>2\*</sup> and Jae Hyuck Jang<sup>1,3\*</sup>*

<sup>1</sup> Center for Research Equipment, Korea Basic Science Institute, Daejeon, Republic of Korea

<sup>2</sup> Center for Scientific Instrumentation, Korea Basic Science Institute, Cheongju, Republic of Korea

<sup>3</sup> Graduate School of Analysis Science and Technology, Chungnam National University, Daejeon, Republic of Korea

Corresponding Author

\* E-mail: cmchoi@kbsi.re.kr, jhjang@kbsi.re.kr

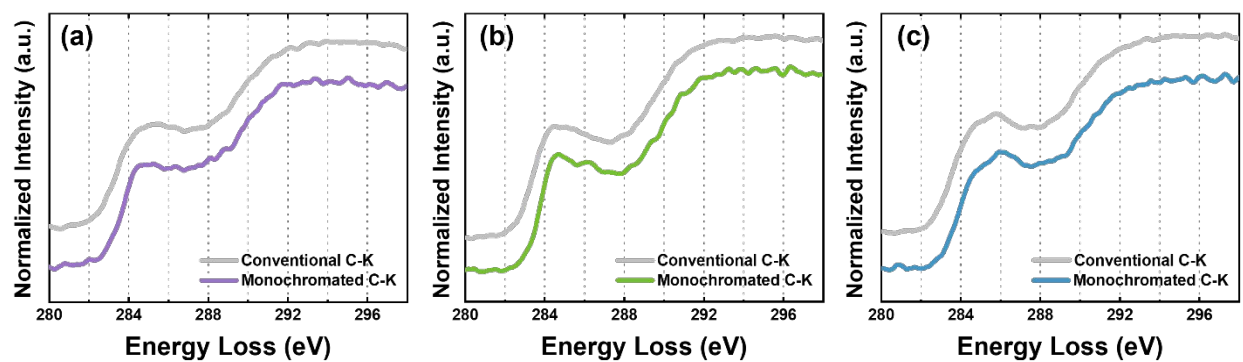

**Figure S1.** Monochromated and conventional C *K* edges for (a) TPBi, (b) TAPC, and (c) Alq3 organic layers. For C *K* edges, the use of monochromator with an energy-selecting slit enhances the characteristic C1 peak of the C *K* edges, providing clarity in the spectral features.

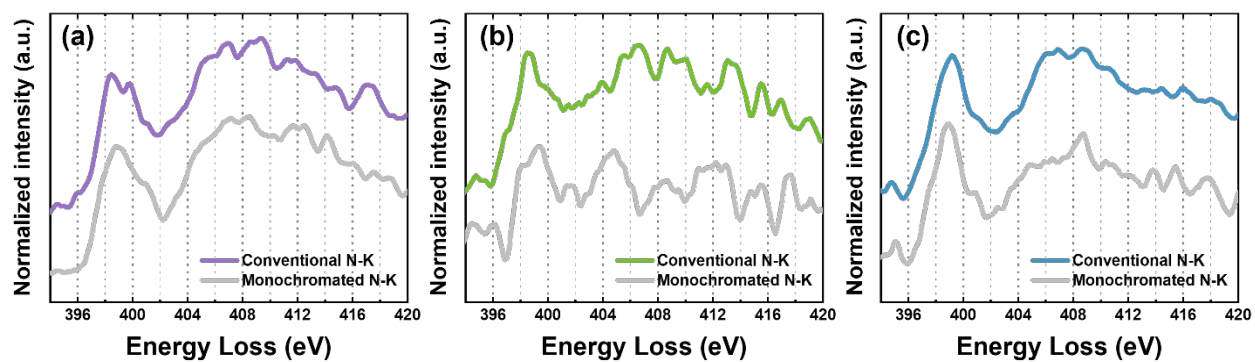

**Figure S2.** Monochromated and conventional N K edges for (a) TPBi, (b) TAPC, and (c) Alq3 organic layers. For N K edges, the use of monochromator with an energy-selecting slit reduces the apparent splitting of the N1 and N2 peaks from the TPBi due to the low signal-to-noise ratio of nitrogen in the organic layers.

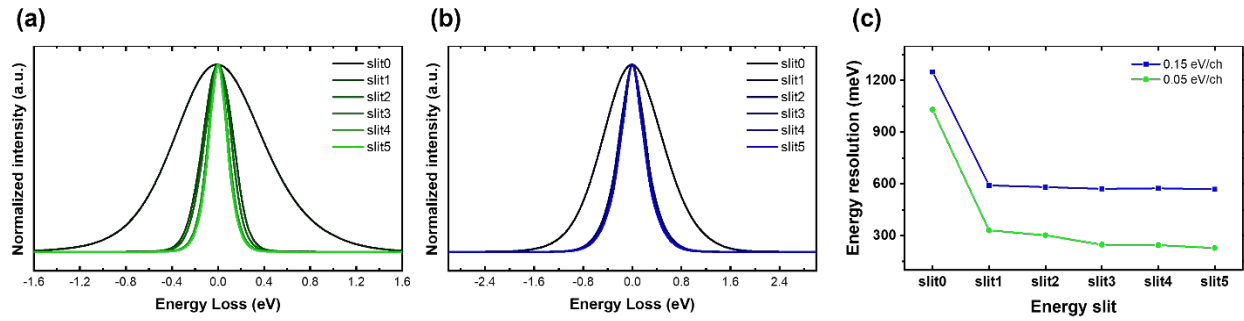

**Figure S3.** Effect of monochromation using different energy-selecting slit with the dispersion of (a) 0.05 eV/channel and (b) 0.15 eV/channel. The energy resolution profiles are shown for both dispersion setups against the energy-selecting slit width, illustrating narrow energy-selecting slits enhance the spectral resolution in EELS measurements.

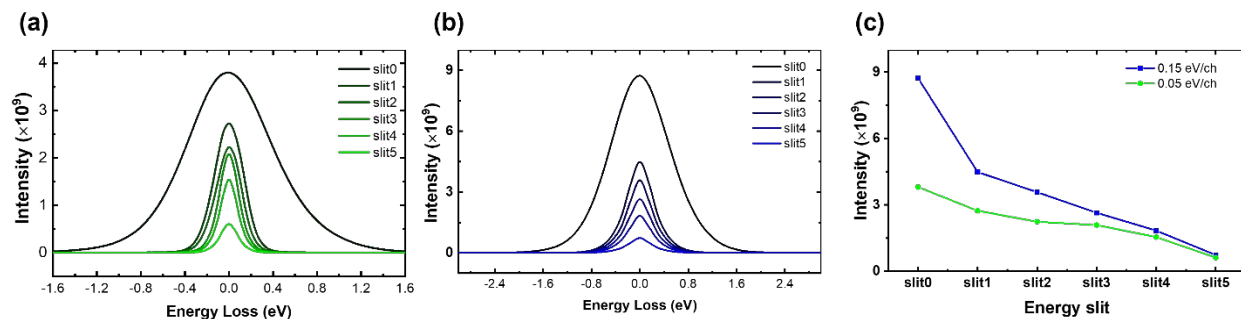

**Figure S4.** Effect of monochromation using different energy-selecting slit with the dispersion of (a) 0.05 eV/channel and (b) 0.15 eV/channel. The electron beam intensity profiles are shown for both dispersion setups against the energy-selecting slit width, illustrating that narrower energy-selecting slits reduce beam intensity.

**Table S1.** EELS measurement results for energy resolution and electron beam intensity (Zero-loss intensity) using energy-selecting slit with different widths. Note that a higher slit number corresponds to a narrower slit width.

| Energy-selecting slit              |            | Slit 0 | Slit 1 | Slit 2 | Slit 3 | Slit 4 | Slit 5 |
|------------------------------------|------------|--------|--------|--------|--------|--------|--------|
| Energy resolution<br>(meV)         | 0.15 eV/ch | 1155   | 523    | 491    | 483    | 471    | 462    |
|                                    | 0.05 eV/ch | 912    | 313    | 274    | 208    | 189    | 189    |
| ZLP intensity<br>( $\times 10^9$ ) | 0.15 eV/ch | 8.72   | 4.48   | 3.57   | 2.64   | 1.83   | 0.73   |
|                                    | 0.05 eV/ch | 3.80   | 2.73   | 2.23   | 2.08   | 1.54   | 0.61   |
